# Supplementary material for: Comparative Analyses of Volatile Metabolites Associated With Gene Expression From Non-climacteric and Climacteric Melon.
Source: Research Square preprint supplement (doi:10.21203/rs.3.rs-831571/v1), 2021-08-30
Supplement: Supplementary file 1 [file 8436e9e16b48c4f03e590778.xlsx]

## Sheet: Y
Supplementary Table S9 Pairwise Person correlation between metabolite versus genes and metobolite versus metabolite of 35 and 45 DAP stages, with respective p values of climacteric 'Yellow' melon. Significant values are highlight in yellow (p<0.01).
	CmLOX9	CmPDC1	CmADH1	CmBCAT1	CmArAT1	CmAAT1	CmLOX18	Cyclobut1enylmethanol	X1Octen3ol	Z6Nonen1ol	E2Octenal	EE24Octadienal	Octanal	X24Nonadienal	Pentanal	EE24Nonadienal	Benzaldehyde	Hexanal	X4Ethylbenzaldehyde	EE24Heptadienal	EZ26Nonadienal	Z6Nonenal	X2Methyl3pentanone	X1Penten3one	X1Octen3one	X2Methylundecane2thiol	X2Methylfuran	E22Pentenylfuran	X2nButyl.furan	X2Pentylfuran	Nonane	Heptane	X1Heptene	Z4Tridecene	Pentyloxirane
CmLOX9	1	-0.254635	0.664239	-0.0446253	0.845269	-0.471469	0.765375	0.934183	0.300909	-0.284081	0.691753	0.321591	0.893372	0.013766	0.387809	0.433819	0.720609	0.121505	-0.120286	0.392235	-0.349364	-0.284081	0.922128	0.631716	0.505489	0.370914	0.193484	0.242056	0.589638	0.281926	0.173216	0.309736	0.474267	0.923805	0.41165
CmPDC1	-0.254635	1	-0.630736	0.319484	-0.365913	0.756045	-0.382366	-0.274301	-0.559381	-0.166258	-0.72192	-0.696107	-0.625397	-0.643723	-0.521962	-0.625514	-0.789521	-0.730615	-0.335395	-0.7159	-0.487831	-0.166258	-0.614196	-0.567718	-0.550989	-0.343373	-0.804777	-0.540797	-0.653472	-0.537293	-0.441503	-0.74939	-0.534399	-0.361272	-0.312268
CmADH1	0.664239	-0.630736	1	-0.613783	0.582069	-0.379466	0.636538	0.665927	0.320874	-0.099368	0.4208	0.175113	0.632952	-0.0177476	0.461459	0.330927	0.546524	0.136399	-0.126375	0.294105	0.0358407	-0.099368	0.628551	0.484102	0.458085	0.43127	0.267276	0.254383	0.364829	0.315095	0.209702	0.40241	0.417361	0.728175	0.47629
CmBCAT1	-0.0446253	0.319484	-0.613783	1	0.279537	0.527977	-0.880461	-0.0721033	-0.737318	-0.352191	-0.303118	-0.252737	-0.464171	-0.154935	-0.886155	-0.648234	-0.394833	-0.280612	-0.0916128	-0.498085	-0.489865	-0.352191	-0.491349	-0.638607	-0.836571	-0.863335	-0.366451	-0.669995	-0.489255	-0.725066	-0.48619	-0.461173	-0.815399	-0.532574	-0.985597
CmArAT1	0.845269	-0.365913	0.582069	0.279537	1	-0.205147	0.49388	0.906254	-0.0543466	-0.403107	0.557693	0.238831	0.648495	-0.00968404	-0.101407	0.115725	0.454977	0.0707938	-0.223738	0.160681	-0.395189	-0.403107	0.647479	0.238204	0.0661006	-0.0800175	0.122039	-0.0762618	0.309304	-0.0616623	-0.0193664	0.194944	0.050639	0.634045	-0.14681
CmAAT1	-0.471469	0.756045	-0.379466	0.527977	-0.205147	1	-0.625583	-0.294147	-0.876748	-0.311107	-0.935269	-0.939359	-0.826046	-0.864752	-0.84576	-0.948417	-0.92194	-0.930817	-0.520308	-0.989987	-0.621578	-0.311107	-0.848446	-0.867695	-0.887737	-0.665021	-0.961433	-0.855981	-0.959153	-0.8461	-0.67101	-0.870697	-0.880475	-0.559119	-0.679622
CmLOX18	0.765375	-0.382366	0.636538	-0.880461	0.49388	-0.625583	1	0.778722	0.77662	0.432374	0.720469	0.557398	0.902427	0.371853	0.82082	0.760871	0.556561	0.456419	-0.399114	0.623247	0.402099	0.432374	0.856259	0.672445	0.880557	0.893994	0.499463	0.741291	0.588596	0.783785	0.764452	0.735847	0.867523	0.951509	0.937853
Cyclobut1enylmethanol	0.934183	-0.274301	0.665927	-0.0721033	0.906254	-0.294147	0.778722	1	0.0772975	-0.12099	0.415397	0.3101	0.303624	-0.0913518	0.12849	0.109805	0.26418	0.0396697	-0.350507	0.159977	-0.184583	-0.12099	0.359978	0.195795	0.235135	0.165074	0.152829	0.0933911	0.148468	0.133949	0.0768906	0.136694	0.410358	0.508008	0.287879
X1Octen3ol	0.300909	-0.559381	0.320874	-0.737318	-0.0543466	-0.876748	0.77662	0.0772975	1	0.437733	0.843221	0.508696	0.781702	0.851081	0.790381	0.971551	0.740408	0.80275	0.496924	0.872918	0.568018	0.437733	0.819491	0.750661	0.969477	0.936518	0.749196	0.98291	0.831373	0.97937	0.941154	0.944919	0.422988	0.746056	0.466943
Z6Nonen1ol	-0.284081	-0.166258	-0.099368	-0.352191	-0.403107	-0.311107	0.432374	-0.12099	0.437733	1	0.167695	0.482154	0.0182614	0.29277	0.161047	0.277334	-0.160179	0.41444	-0.341882	0.305441	0.882498	1	-0.0562118	-0.179284	0.368203	0.46291	0.428571	0.564076	-0.0748481	0.569153	0.574989	0.383326	0.582657	-0.0442074	0.435836
E2Octenal	0.691753	-0.72192	0.4208	-0.303118	0.557693	-0.935269	0.720469	0.415397	0.843221	0.167695	1	0.698943	0.806894	0.830267	0.703334	0.894704	0.879652	0.852306	0.416611	0.907463	0.354417	0.167695	0.874656	0.791489	0.860727	0.688297	0.85125	0.835117	0.888655	0.823785	0.756381	0.882802	0.460402	0.750447	0.324685
EE24Octadienal	0.321591	-0.696107	0.175113	-0.252737	0.238831	-0.939359	0.557398	0.3101	0.508696	0.482154	0.698943	1	0.366215	0.580325	0.534535	0.511273	0.4262	0.744786	-0.16484	0.674986	0.600063	0.482154	0.366389	0.34577	0.558883	0.322391	0.895429	0.608698	0.43306	0.604291	0.441519	0.53393	0.820317	0.187854	0.413912
Octanal	0.893372	-0.625397	0.632952	-0.464171	0.648495	-0.826046	0.902427	0.303624	0.781702	0.0182614	0.806894	0.366215	1	0.802554	0.604959	0.886444	0.691876	0.483751	0.425697	0.581873	0.026033	0.0182614	0.969637	0.671693	0.777771	0.703511	0.523495	0.69359	0.757986	0.691067	0.761324	0.862047	0.142673	0.903085	0.0444578
X24Nonadienal	0.013766	-0.643723	-0.0177476	-0.154935	-0.00968404	-0.864752	0.371853	-0.0913518	0.851081	0.29277	0.830267	0.580325	0.802554	1	0.583932	0.917556	0.693012	0.812614	0.544949	0.782461	0.417365	0.29277	0.7808	0.619177	0.758936	0.632456	0.78072	0.825723	0.79253	0.787684	0.829228	0.916515	0.206976	0.568956	0.0270666
Pentanal	0.387809	-0.521962	0.461459	-0.886155	-0.101407	-0.84576	0.82082	0.12849	0.790381	0.161047	0.703334	0.534535	0.604959	0.583932	1	0.769071	0.754059	0.642624	0.399977	0.778584	0.410526	0.161047	0.690886	0.869275	0.886171	0.752848	0.71265	0.764625	0.798009	0.789435	0.556643	0.651993	0.603448	0.600901	0.694229
EE24Nonadienal	0.433819	-0.625514	0.330927	-0.648234	0.115725	-0.948417	0.760871	0.109805	0.971551	0.277334	0.894704	0.511273	0.886444	0.917556	0.769071	1	0.798743	0.78132	0.559596	0.85166	0.405696	0.277334	0.911127	0.790887	0.939846	0.863422	0.744994	0.929422	0.888927	0.917902	0.907102	0.963036	0.323815	0.800932	0.306166
Benzaldehyde	0.720609	-0.789521	0.546524	-0.394833	0.454977	-0.92194	0.556561	0.26418	0.740408	-0.160179	0.879652	0.4262	0.691876	0.693012	0.754059	0.798743	1	0.763767	0.695683	0.870462	0.177603	-0.160179	0.828178	0.946793	0.773947	0.595933	0.711906	0.682668	0.965121	0.673434	0.549195	0.74022	0.23519	0.697692	0.310979
Hexanal	0.121505	-0.730615	0.136399	-0.280612	0.0707938	-0.930817	0.456419	0.0396697	0.80275	0.41444	0.852306	0.744786	0.483751	0.812614	0.642624	0.78132	0.763767	1	0.443365	0.961765	0.69558	0.41444	0.567692	0.660605	0.760585	0.594511	0.937963	0.851472	0.782731	0.82318	0.709594	0.793591	0.504374	0.374031	0.39256
X4Ethylbenzaldehyde	-0.120286	-0.335395	-0.126375	-0.0916128	-0.223738	-0.520308	-0.399114	-0.350507	0.496924	-0.341882	0.416611	-0.16484	0.425697	0.544949	0.399977	0.559596	0.695683	0.443365	1	0.517773	-0.054153	-0.341882	0.536438	0.707151	0.411086	0.369274	0.227921	0.385695	0.746352	0.345813	0.356753	0.458682	-0.390432	0.402024	-0.0948209
EE24Heptadienal	0.392235	-0.7159	0.294105	-0.498085	0.160681	-0.989987	0.623247	0.159977	0.872918	0.305441	0.907463	0.674986	0.581873	0.782461	0.778584	0.85166	0.870462	0.961765	0.517773	1	0.598715	0.305441	0.697746	0.819892	0.873039	0.721688	0.897234	0.893766	0.890178	0.879573	0.734212	0.819585	0.523225	0.553883	0.518875
EZ26Nonadienal	-0.349364	-0.487831	0.0358407	-0.489865	-0.395189	-0.621578	0.402099	-0.184583	0.568018	0.882498	0.354417	0.600063	0.026033	0.417365	0.410526	0.405696	0.177603	0.69558	-0.054153	0.598715	1	0.882498	0.0385831	0.137257	0.514719	0.513265	0.678844	0.689256	0.213403	0.688052	0.576818	0.485741	0.653421	-0.0361319	0.58366
Z6Nonenal	-0.284081	-0.166258	-0.099368	-0.352191	-0.403107	-0.311107	0.432374	-0.12099	0.437733	1	0.167695	0.482154	0.0182614	0.29277	0.161047	0.277334	-0.160179	0.41444	-0.341882	0.305441	0.882498	1	-0.0562118	-0.179284	0.368203	0.46291	0.428571	0.564076	-0.0748481	0.569153	0.574989	0.383326	0.582657	-0.0442074	0.435836
X2Methyl3pentanone	0.922128	-0.614196	0.628551	-0.491349	0.647479	-0.848446	0.856259	0.359978	0.819491	-0.0562118	0.874656	0.366389	0.969637	0.7808	0.690886	0.911127	0.828178	0.567692	0.536438	0.697746	0.0385831	-0.0562118	1	0.814609	0.837365	0.74433	0.568364	0.731627	0.872636	0.730562	0.743919	0.860302	0.177638	0.938986	0.166875
X1Penten3one	0.631716	-0.567718	0.484102	-0.638607	0.238204	-0.867695	0.672445	0.195795	0.750661	-0.179284	0.791489	0.34577	0.671693	0.619177	0.869275	0.790887	0.946793	0.660605	0.707151	0.819892	0.137257	-0.179284	0.814609	1	0.816323	0.667014	0.617535	0.679818	0.960211	0.682618	0.512251	0.661472	0.276242	0.715073	0.450283
X1Octen3one	0.505489	-0.550989	0.458085	-0.836571	0.0661006	-0.887737	0.880557	0.235135	0.969477	0.368203	0.860727	0.558883	0.777771	0.758936	0.886171	0.939846	0.773947	0.760585	0.411086	0.873039	0.514719	0.368203	0.837365	0.816323	1	0.938466	0.757304	0.953638	0.842508	0.966169	0.861078	0.886451	0.553669	0.789998	0.606569
X2Methylundecane2thiol	0.370914	-0.343373	0.43127	-0.863335	-0.0800175	-0.665021	0.893994	0.165074	0.936518	0.46291	0.688297	0.322391	0.703511	0.632456	0.752848	0.863422	0.595933	0.594511	0.369274	0.721688	0.513265	0.46291	0.74433	0.667014	0.938466	1	0.540062	0.913908	0.687184	0.933282	0.897085	0.828079	0.427952	0.78882	0.599145
X2Methylfuran	0.193484	-0.804777	0.267276	-0.366451	0.122039	-0.961433	0.499463	0.152829	0.749196	0.428571	0.85125	0.895429	0.523495	0.78072	0.71265	0.744994	0.711906	0.937963	0.227921	0.897234	0.678844	0.428571	0.568364	0.617535	0.757304	0.540062	1	0.805823	0.711057	0.793276	0.638877	0.766652	0.675882	0.3625	0.435836
E22Pentenylfuran	0.242056	-0.540797	0.254383	-0.669995	-0.0762618	-0.855981	0.741291	0.0933911	0.98291	0.564076	0.835117	0.608698	0.69359	0.825723	0.764625	0.929422	0.682668	0.851472	0.385695	0.893766	0.689256	0.564076	0.731627	0.679818	0.953638	0.913908	0.805823	1	0.770516	0.996406	0.936975	0.918956	0.539007	0.655326	0.536388
X2nButyl.furan	0.589638	-0.653472	0.364829	-0.489255	0.309304	-0.959153	0.588596	0.148468	0.831373	-0.0748481	0.888655	0.43306	0.757986	0.79253	0.798009	0.888927	0.965121	0.782731	0.746352	0.890178	0.213403	-0.0748481	0.872636	0.960211	0.842508	0.687184	0.711057	0.770516	1	0.754771	0.652725	0.794986	0.232009	0.730062	0.311387
X2Pentylfuran	0.281926	-0.537293	0.315095	-0.725066	-0.0616623	-0.8461	0.783785	0.133949	0.97937	0.569153	0.823785	0.604291	0.691067	0.787684	0.789435	0.917902	0.673434	0.82318	0.345813	0.879573	0.688052	0.569153	0.730562	0.682618	0.966169	0.933282	0.793276	0.996406	0.754771	1	0.927133	0.906032	0.576849	0.67373	0.58807
Nonane	0.173216	-0.441503	0.209702	-0.48619	-0.0193664	-0.67101	0.764452	0.0768906	0.941154	0.574989	0.756381	0.441519	0.761324	0.829228	0.556643	0.907102	0.549195	0.709594	0.356753	0.734212	0.576818	0.574989	0.743919	0.512251	0.861078	0.897085	0.638877	0.936975	0.652725	0.927133	1	0.942857	0.32311	0.709352	0.301227
Heptane	0.309736	-0.74939	0.40241	-0.461173	0.194944	-0.870697	0.735847	0.136694	0.944919	0.383326	0.882802	0.53393	0.862047	0.916515	0.651993	0.963036	0.74022	0.793591	0.458682	0.819585	0.485741	0.383326	0.860302	0.661472	0.886451	0.828079	0.766652	0.918956	0.794986	0.906032	0.942857	1	0.312687	0.757592	0.23035
X1Heptene	0.474267	-0.534399	0.417361	-0.815399	0.050639	-0.880475	0.867523	0.410358	0.422988	0.582657	0.460402	0.820317	0.142673	0.206976	0.603448	0.323815	0.23519	0.504374	-0.390432	0.523225	0.653421	0.582657	0.177638	0.276242	0.553669	0.427952	0.675882	0.539007	0.232009	0.576849	0.32311	0.312687	1	0.159533	0.808
Z4Tridecene	0.923805	-0.361272	0.728175	-0.532574	0.634045	-0.559119	0.951509	0.508008	0.746056	-0.0442074	0.750447	0.187854	0.903085	0.568956	0.600901	0.800932	0.697692	0.374031	0.402024	0.553883	-0.0361319	-0.0442074	0.938986	0.715073	0.789998	0.78882	0.3625	0.655326	0.730062	0.67373	0.709352	0.757592	0.159533	1	0.254537
Pentyloxirane	0.41165	-0.312268	0.47629	-0.985597	-0.14681	-0.679622	0.937853	0.287879	0.466943	0.435836	0.324685	0.413912	0.0444578	0.0270666	0.694229	0.306166	0.310979	0.39256	-0.0948209	0.518875	0.58366	0.435836	0.166875	0.450283	0.606569	0.599145	0.435836	0.536388	0.311387	0.58807	0.301227	0.23035	0.808	0.254537	1
P value
	CmLOX9	CmPDC1	CmADH1	CmBCAT1	CmArAT1	CmAAT1	CmLOX18	Cyclobut1enylmethanol	X1Octen3ol	Z6Nonen1ol	E2Octenal	EE24Octadienal	Octanal	X24Nonadienal	Pentanal	EE24Nonadienal	Benzaldehyde	Hexanal	X4Ethylbenzaldehyde	EE24Heptadienal	EZ26Nonadienal	Z6Nonenal	X2Methyl3pentanone	X1Penten3one	X1Octen3one	X2Methylundecane2thiol	X2Methylfuran	E22Pentenylfuran	X2nButyl.furan	X2Pentylfuran	Nonane	Heptane	X1Heptene	Z4Tridecene	Pentyloxirane
CmLOX9	NA	0.679327	0.221409	0.955375	0.154731	0.422754	0.234625	0.0200681	0.622733	0.643223	0.195661	0.59771	0.0411216	0.982473	0.518899	0.465495	0.169651	0.845676	0.847217	0.513709	0.564399	0.643223	0.0257792	0.252946	0.385355	0.538802	0.755195	0.694841	0.295362	0.645854	0.780563	0.612031	0.419615	0.0249574	0.491075
CmPDC1	0.679327	NA	0.179359	0.60025	0.544722	0.0820118	0.525294	0.598868	0.248446	0.752911	0.105241	0.124494	0.184208	0.167788	0.28816	0.184101	0.0617898	0.099078	0.515772	0.109604	0.326301	0.752911	0.194554	0.239912	0.257283	0.505183	0.0534478	0.267885	0.159316	0.271614	0.380776	0.0863384	0.274709	0.481669	0.546823
CmADH1	0.221409	0.179359	NA	0.27081	0.303173	0.458121	0.248198	0.148765	0.535208	0.851439	0.406057	0.740015	0.177361	0.973381	0.356945	0.52173	0.261834	0.79667	0.811447	0.571562	0.946262	0.851439	0.181336	0.330572	0.361169	0.393202	0.608632	0.626656	0.477037	0.543	0.690058	0.428967	0.410309	0.100791	0.339589
CmBCAT1	0.955375	0.60025	0.27081	NA	0.648774	0.360448	0.119539	0.908275	0.155089	0.561028	0.620053	0.681665	0.430966	0.803523	0.0453157	0.236785	0.510668	0.647459	0.883518	0.393115	0.402215	0.561028	0.400569	0.246168	0.0772523	0.0593897	0.544083	0.21595	0.402892	0.16573	0.406299	0.434351	0.0925288	0.355486	0.00207044
CmArAT1	0.154731	0.544722	0.303173	0.648774	NA	0.740642	0.50612	0.0339672	0.930838	0.501008	0.328675	0.698827	0.236532	0.98767	0.871106	0.852984	0.441363	0.909938	0.717523	0.796298	0.510253	0.501008	0.237518	0.699602	0.916428	0.898227	0.845002	0.902995	0.612554	0.921539	0.975343	0.753371	0.935552	0.250649	0.81375
CmAAT1	0.422754	0.0820118	0.458121	0.360448	0.740642	NA	0.259018	0.571504	0.0218503	0.548395	0.00614955	0.00540446	0.0427581	0.0262009	0.0338502	0.00392252	0.00890222	0.00701389	0.289967	0.000149891	0.187709	0.548395	0.0327124	0.025099	0.0182152	0.149522	0.00220243	0.0296185	0.00246859	0.0337054	0.144547	0.0239981	0.0205755	0.248715	0.137521
CmLOX18	0.234625	0.525294	0.248198	0.119539	0.50612	0.259018	NA	0.120718	0.122401	0.467154	0.169775	0.328987	0.0360467	0.537692	0.0885595	0.135225	0.329872	0.439728	0.505666	0.261342	0.502183	0.467154	0.0639899	0.213637	0.0487102	0.0407661	0.391594	0.151683	0.296435	0.116694	0.132276	0.156355	0.0567183	0.0127246	0.0184237
Cyclobut1enylmethanol	0.0200681	0.598868	0.148765	0.908275	0.0339672	0.571504	0.120718	NA	0.855643	0.775349	0.306091	0.454762	0.464725	0.829666	0.76172	0.795764	0.527227	0.925697	0.394643	0.705121	0.661687	0.775349	0.381083	0.642159	0.575561	0.696063	0.717876	0.825907	0.725686	0.751834	0.856397	0.746873	0.312592	0.198676	0.489307
1Octen3ol	0.622733	0.248446	0.535208	0.155089	0.930838	0.0218503	0.122401	0.855643	NA	0.278067	0.0085366	0.197967	0.0219349	0.00736173	0.0195584	5.6344e+09	0.0356608	0.0164598	0.210289	0.00465429	0.141877	0.278067	0.0127852	0.0318677	6.92042e+09	0.000609498	0.0323937	1.23193e+09	0.0105224	2.16134e+08	0.000487217	0.000400716	0.296421	0.0335391	0.24342
Z6Nonen1ol	0.643223	0.752911	0.851439	0.561028	0.501008	0.548395	0.467154	0.775349	0.278067	NA	0.691418	0.226299	0.965767	0.481618	0.703217	0.506048	0.704762	0.307321	0.407171	0.46192	0.00370682	NA	0.894825	0.670976	0.369266	0.248066	0.289403	0.145291	0.860183	0.140902	0.13595	0.348567	0.129593	0.917219	0.280396
E2Octenal	0.195661	0.105241	0.406057	0.620053	0.328675	0.00614955	0.169775	0.306091	0.0085366	0.691418	NA	0.0537407	0.0154957	0.0107213	0.0516125	0.00269294	0.00397379	0.0071885	0.304535	0.00184605	0.389019	0.691418	0.00447206	0.019267	0.00608173	0.0591152	0.00733768	0.00986635	0.00316927	0.0119353	0.0298642	0.00367895	0.250978	0.0319442	0.432648
EE24Octadienal	0.59771	0.124494	0.740015	0.681665	0.698827	0.00540446	0.328987	0.454762	0.197967	0.226299	0.0537407	NA	0.372269	0.131508	0.172297	0.195321	0.292374	0.0340092	0.696479	0.0662689	0.115791	0.226299	0.372025	0.401501	0.14988	0.436096	0.00263925	0.109269	0.283822	0.112571	0.273446	0.172875	0.0126189	0.655972	0.308
Octanal	0.0411216	0.184208	0.177361	0.430966	0.236532	0.0427581	0.0360467	0.464725	0.0219349	0.965767	0.0154957	0.372269	NA	0.0165063	0.112067	0.00335604	0.0572746	0.224539	0.293005	0.130235	0.95121	0.965767	6.83963e+09	0.0681138	0.0230677	0.0515279	0.183032	0.056405	0.0293166	0.0576876	0.028197	0.00590308	0.736097	0.00211348	0.916751
24Nonadienal	0.982473	0.167788	0.973381	0.803523	0.98767	0.0262009	0.537692	0.829666	0.00736173	0.481618	0.0107213	0.131508	0.0165063	NA	0.128552	0.00131571	0.0566971	0.0142242	0.16249	0.0217203	0.303569	0.481618	0.0221917	0.101641	0.0289702	0.0924263	0.0222145	0.0115637	0.0189958	0.0202787	0.0109104	0.0013651	0.622861	0.141071	0.949275
Pentanal	0.518899	0.28816	0.356945	0.0453157	0.871106	0.0338502	0.0885595	0.76172	0.0195584	0.703217	0.0516125	0.172297	0.112067	0.128552	NA	0.0257017	0.030668	0.0857094	0.32619	0.0228305	0.312375	0.703217	0.0577802	0.00505165	0.00337839	0.0310924	0.0472675	0.0271163	0.0176081	0.0198092	0.151849	0.0797797	0.113209	0.115149	0.056083
EE24Nonadienal	0.465495	0.184101	0.52173	0.236785	0.852984	0.00392252	0.135225	0.795764	5.6344e+09	0.506048	0.00269294	0.195321	0.00335604	0.00131571	0.0257017	NA	0.0174272	0.0220435	0.149224	0.00727956	0.318666	0.506048	0.00163999	0.019425	0.000519215	0.00573455	0.0339319	0.000833063	0.0031468	0.00129958	0.00186721	0.000122786	0.433955	0.0168945	0.460804
Benzaldehyde	0.169651	0.0617898	0.261834	0.510668	0.441363	0.00890222	0.329872	0.527227	0.0356608	0.704762	0.00397379	0.292374	0.0572746	0.0566971	0.030668	0.0174272	NA	0.0273947	0.055354	0.00491989	0.673931	0.704762	0.0111036	0.000361704	0.0242466	0.118987	0.0476061	0.0620817	0.00010332	0.0671348	0.158581	0.035733	0.575011	0.0543567	0.453416
Hexanal	0.845676	0.099078	0.79667	0.647459	0.909938	0.00701389	0.439728	0.925697	0.0164598	0.307321	0.0071885	0.0340092	0.224539	0.0142242	0.0857094	0.0220435	0.0273947	NA	0.271208	0.000135759	0.0554055	0.307321	0.142158	0.0745469	0.0284556	0.120099	0.000569465	0.00730618	0.0216442	0.0120527	0.0486674	0.018722	0.202445	0.361355	0.336073
4Ethylbenzaldehyde	0.847217	0.515772	0.811447	0.883518	0.717523	0.289967	0.505666	0.394643	0.210289	0.407171	0.304535	0.696479	0.293005	0.16249	0.32619	0.149224	0.055354	0.271208	NA	0.188732	0.898661	0.407171	0.170482	0.0498043	0.311652	0.36798	0.587217	0.345342	0.0334302	0.401439	0.385677	0.252984	0.338934	0.323487	0.823274
EE24Heptadienal	0.513709	0.109604	0.571562	0.393115	0.796298	0.000149891	0.261342	0.705121	0.00465429	0.46192	0.00184605	0.0662689	0.130235	0.0217203	0.0228305	0.00727956	0.00491989	0.000135759	0.188732	NA	0.116829	0.46192	0.0543297	0.0127044	0.00464895	0.0432703	0.00250841	0.00276358	0.00304461	0.00398139	0.0380807	0.0127662	0.183298	0.154325	0.187627
EZ26Nonadienal	0.564399	0.326301	0.946262	0.402215	0.510253	0.187709	0.502183	0.661687	0.141877	0.00370682	0.389019	0.115791	0.95121	0.303569	0.312375	0.318666	0.673931	0.0554055	0.898661	0.116829	NA	0.00370682	0.927729	0.745856	0.191718	0.193289	0.0641456	0.0586189	0.611852	0.0592425	0.134419	0.222355	0.0788974	0.932312	0.128774
Z6Nonenal	0.643223	0.752911	0.851439	0.561028	0.501008	0.548395	0.467154	0.775349	0.278067	NA	0.691418	0.226299	0.965767	0.481618	0.703217	0.506048	0.704762	0.307321	0.407171	0.46192	0.00370682	NA	0.894825	0.670976	0.369266	0.248066	0.289403	0.145291	0.860183	0.140902	0.13595	0.348567	0.129593	0.917219	0.280396
2Methyl3pentanone	0.0257792	0.194554	0.181336	0.400569	0.237518	0.0327124	0.0639899	0.381083	0.0127852	0.894825	0.00447206	0.372025	6.83963e+09	0.0221917	0.0577802	0.00163999	0.0111036	0.142158	0.170482	0.0543297	0.927729	0.894825	NA	0.0137968	0.00949494	0.0341792	0.14158	0.0391189	0.00468435	0.0395515	0.0343325	0.00612155	0.673869	0.000542166	0.69287
1Penten3one	0.252946	0.239912	0.330572	0.246168	0.699602	0.025099	0.213637	0.642159	0.0318677	0.670976	0.019267	0.401501	0.0681138	0.101641	0.00505165	0.019425	0.000361704	0.0745469	0.0498043	0.0127044	0.745856	0.670976	0.0137968	NA	0.0134553	0.0707869	0.102815	0.0636161	0.000152824	0.0621082	0.194322	0.0740316	0.507793	0.0461749	0.262899
1Octen3one	0.385355	0.257283	0.361169	0.0772523	0.916428	0.0182152	0.0487102	0.575561	6.92042e+09	0.369266	0.00608173	0.14988	0.0230677	0.0289702	0.00337839	0.000519215	0.0242466	0.0284556	0.311652	0.00464895	0.191718	0.369266	0.00949494	0.0134553	NA	0.000554944	0.0295579	0.000239961	0.0086603	9.4084e+09	0.00601577	0.00335405	0.154543	0.0196831	0.11089
2Methylundecane2thiol	0.538802	0.505183	0.393202	0.0593897	0.898227	0.149522	0.0407661	0.696063	0.000609498	0.248066	0.0591152	0.436096	0.0515279	0.0924263	0.0310924	0.00573455	0.118987	0.120099	0.36798	0.0432703	0.193289	0.248066	0.0341792	0.0707869	0.000554944	NA	0.167053	0.00149403	0.0596949	0.000705799	0.00251904	0.011122	0.290177	0.0199732	0.116498
2Methylfuran	0.755195	0.0534478	0.608632	0.544083	0.845002	0.00220243	0.391594	0.717876	0.0323937	0.289403	0.00733768	0.00263925	0.183032	0.0222145	0.0472675	0.0339319	0.0476061	0.000569465	0.587217	0.00250841	0.0641456	0.289403	0.14158	0.102815	0.0295579	0.167053	NA	0.0157414	0.0479942	0.0188032	0.0881507	0.0264655	0.0657721	0.377508	0.280396
E22Pentenylfuran	0.694841	0.267885	0.626656	0.21595	0.902995	0.0296185	0.151683	0.825907	1.23193e+09	0.145291	0.00986635	0.109269	0.056405	0.0115637	0.0271163	0.000833063	0.0620817	0.00730618	0.345342	0.00276358	0.0586189	0.145291	0.0391189	0.0636161	0.000239961	0.00149403	0.0157414	NA	0.0252519	1.15741e+07	0.000596652	0.00125118	0.168047	0.0777295	0.170528
2nButyl.furan	0.295362	0.159316	0.477037	0.402892	0.612554	0.00246859	0.296435	0.725686	0.0105224	0.860183	0.00316927	0.283822	0.0293166	0.0189958	0.0176081	0.0031468	0.00010332	0.0216442	0.0334302	0.00304461	0.611852	0.860183	0.00468435	0.000152824	0.0086603	0.0596949	0.0479942	0.0252519	NA	0.0304201	0.0793266	0.0183657	0.580341	0.0397557	0.452792
2Pentylfuran	0.645854	0.271614	0.543	0.16573	0.921539	0.0337054	0.116694	0.751834	2.16134e+08	0.140902	0.0119353	0.112571	0.0576876	0.0202787	0.0198092	0.00129958	0.0671348	0.0120527	0.401439	0.00398139	0.0592425	0.140902	0.0395515	0.0621082	9.4084e+09	0.000705799	0.0188032	1.15741e+07	0.0304201	NA	0.000915136	0.00193089	0.134393	0.0669694	0.125207
Nonane	0.780563	0.380776	0.690058	0.406299	0.975343	0.144547	0.132276	0.856397	0.000487217	0.13595	0.0298642	0.273446	0.028197	0.0109104	0.151849	0.00186721	0.158581	0.0486674	0.385677	0.0380807	0.134419	0.13595	0.0343325	0.194322	0.00601577	0.00251904	0.0881507	0.000596652	0.0793266	0.000915136	NA	0.000446709	0.435015	0.0487793	0.468435
Heptane	0.612031	0.0863384	0.428967	0.434351	0.753371	0.0239981	0.156355	0.746873	0.000400716	0.348567	0.00367895	0.172875	0.00590308	0.0013651	0.0797797	0.000122786	0.035733	0.018722	0.252984	0.0127662	0.222355	0.348567	0.00612155	0.0740316	0.00335405	0.011122	0.0264655	0.00125118	0.0183657	0.00193089	0.000446709	NA	0.450807	0.0294505	0.583128
1Heptene	0.419615	0.274709	0.410309	0.0925288	0.935552	0.0205755	0.0567183	0.312592	0.296421	0.129593	0.250978	0.0126189	0.736097	0.622861	0.113209	0.433955	0.575011	0.202445	0.338934	0.183298	0.0788974	0.129593	0.673869	0.507793	0.154543	0.290177	0.0657721	0.168047	0.580341	0.134393	0.435015	0.450807	NA	0.705912	0.0152445
Z4Tridecene	0.0249574	0.481669	0.100791	0.355486	0.250649	0.248715	0.0127246	0.198676	0.0335391	0.917219	0.0319442	0.655972	0.00211348	0.141071	0.115149	0.0168945	0.0543567	0.361355	0.323487	0.154325	0.932312	0.917219	0.000542166	0.0461749	0.0196831	0.0199732	0.377508	0.0777295	0.0397557	0.0669694	0.0487793	0.0294505	0.705912	NA	0.542957
Pentyloxirane	0.491075	0.546823	0.339589	0.00207044	0.81375	0.137521	0.0184237	0.489307	0.24342	0.280396	0.432648	0.308	0.916751	0.949275	0.056083	0.460804	0.453416	0.336073	0.823274	0.187627	0.128774	0.280396	0.69287	0.262899	0.11089	0.116498	0.280396	0.170528	0.452792	0.125207	0.468435	0.583128	0.0152445	0.542957	NA
